# Supplementary material for: A high-throughput screen to identify enhancers of ADAR-mediated RNA-editing
Source: PubMed Central journal article supplement — RNA Biol. 2013 Feb 1;10(2):192–204. doi: 10.4161/rna.23208 (PMC3594278; doi:10.4161/rna.23208), 2013-02-01
Supplement: rna-10-192-s01.pdf [file rna-10-192-s01.pdf]

## **Supplemental Material to:**

**Wojciech Garrncarz, Aamira Tariq, Cornelia Handl, Oliver  
Pusch and Michael F. Jantsch**

**A high throughput screen to identify enhancers of ADAR-  
mediated RNA-editing**

**2013; 10(2)**

**<http://dx.doi.org/10.4161/rna.23208>**

**[www.landesbioscience.com/journals/rnabiology/article/23208/](http://www.landesbioscience.com/journals/rnabiology/article/23208/)**

## Supplementary data

**Table S1:** Impact of isolated candidates on editing levels determined by direct sequencing of a reporter construct. The hit # is indicated and the predicted gene. Increase in editing relative to a MOCK control is indicated for two independent experiments. Sometimes only the 3' UTR of a gene was contained. The proposed molecular function is indicated where known

| #  | protein              | Increase in editing level<br>(vs. control) [in %] (1 <sup>st</sup> /2 <sup>nd</sup> run) | sequence | function                                      |
|----|----------------------|------------------------------------------------------------------------------------------|----------|-----------------------------------------------|
| 1  | chromosome 5 contig  | 18 / 42                                                                                  | ?        | unknown                                       |
| 2  | FABP7                | 18 / 27                                                                                  | coding   | fatty acid binding                            |
| 10 | STK38                | 14.5 / 6.5                                                                               | coding   | kinase                                        |
| 11 | SSRP1                | 17 / 23.5                                                                                | coding   | DNA-binding                                   |
| 21 | KAT5/HTATIP          | 16.5 / 28                                                                                | coding   | acetyl transferase                            |
| 22 | DYRK2                | 50 / n.d.                                                                                | 3'UTR    | RNA                                           |
| 23 | WIPF2                | 19 / 18                                                                                  | 3'UTR    | RNA                                           |
| 32 | SOX1                 | 15 / 18                                                                                  | 3'UTR    | RNA                                           |
| 35 | GPX4                 | 16.5 / 24.5                                                                              | coding   | glutathione peroxidase                        |
| 36 | DSS1/SHFM1           | 35 / 22.5                                                                                | coding   | proteasome subunit                            |
| 40 | hnRNP A2B1           | 12 / 10                                                                                  | Coding   | RNA-binding                                   |
| 42 | ZBTB4                | 27 / 40                                                                                  | 3'UTR    | RNA                                           |
| 44 | chromosome 17 contig | 14.5 / 33.5                                                                              | ?        | unknown                                       |
| 48 | DNAJB6               | 38.5 / 29.5                                                                              | coding   | chaperone                                     |
| 52 | Q5TGE2               | 30.5 / 2.5                                                                               | 3'UTR    | RNA                                           |
| 60 | TCTP                 | 47 / 20.5                                                                                | coding   | calcium binding/<br>microtubule stabilization |

**Figure S1**

**a)**

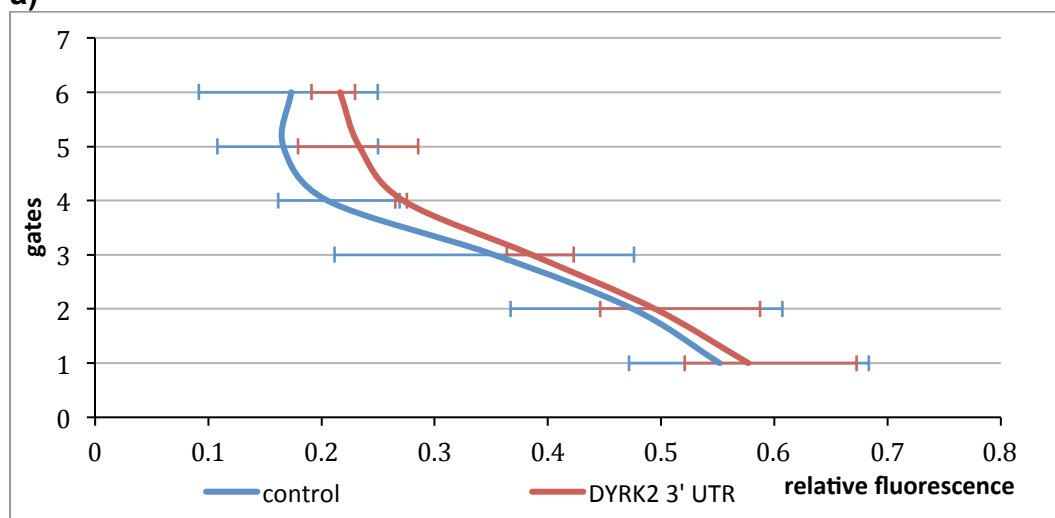

**b)**

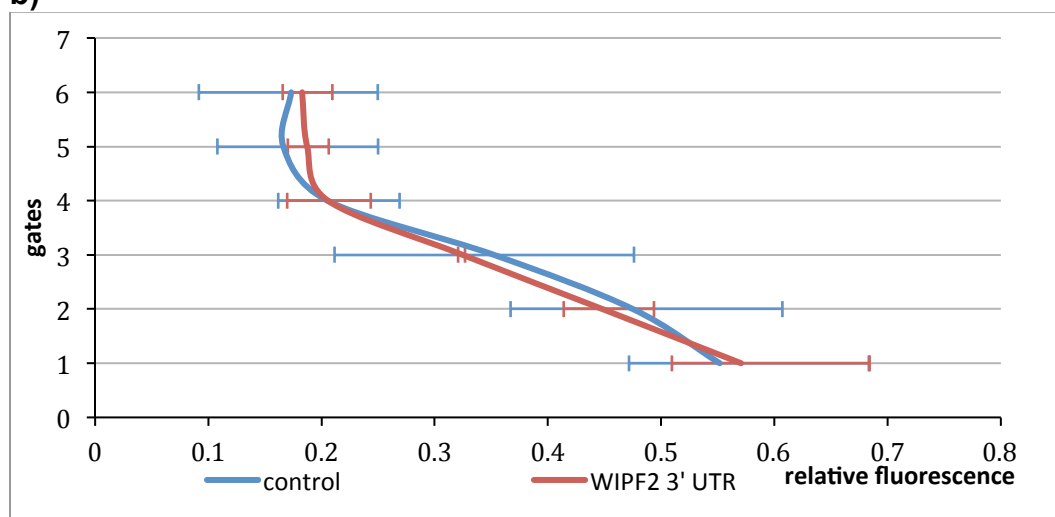

**c)**

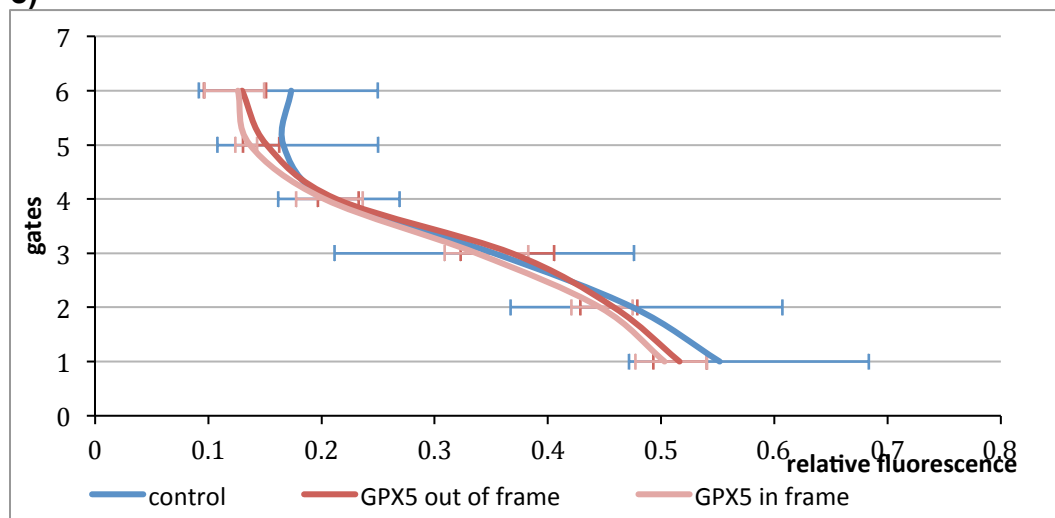

**Figure S1: Verification of enhancers of editing in tissue culture cells by FACS analysis of a RFP-editable-stem-loop-GFP construct.** HeLa cells were transfected with an editable RFP-GFP construct and an empty vector (control) or the candidates identified in the yeast screen cloned in-frame or out-of-frame, as indicated. In the absence of editing, only RFP fluorescence can be seen, while editing leads to a simultaneous expression of GFP. Stimulation of editing leads to a shift of fluorescence intensities along the x-axis to the right. **a)** the 3' UTR of the DYRK2 kinase had a stimulatory effect on ADAR2 activity in HeLa cells, as in the primary screen in yeast cells. **b)** In contrast, the 3' UTR of WIPF2 but also the coding region of GPX5 **(c)** did not stimulate editing, indicating that some, but not all candidate clones identified in the yeast screen could act in tissue culture cells.

**A**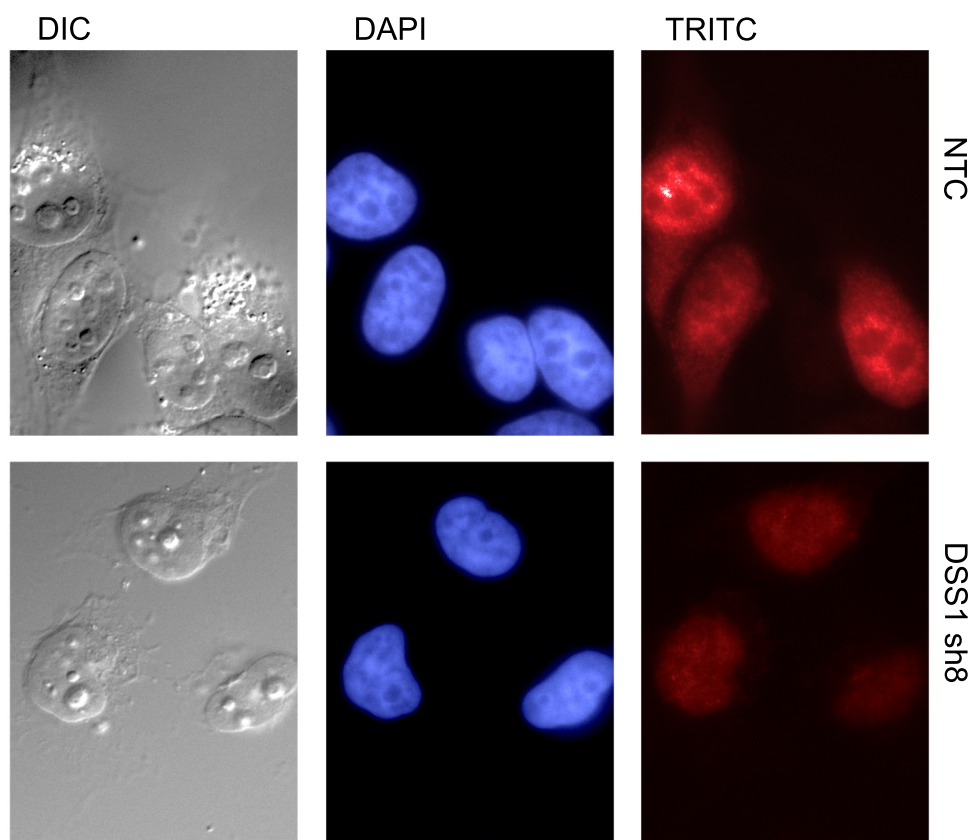**B**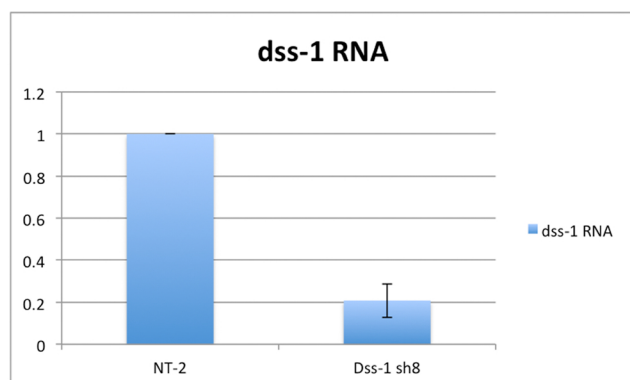**C**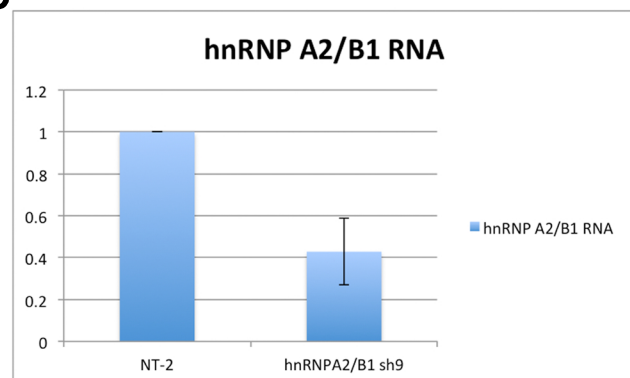

**Figure S2: delivery of shRNAs against DSS1 and hnRNP A2B1 reduce the corresponding protein and RNA levels.** shRNAs directed against hnRNP DSS1 or hnRNP A2/B1 were delivered using lentiviral mediated transfection. Stable knock-down clones were selected and tested for knockdown efficiency. A) Repression of DSS-1 protein expression was tested on a cell line stably expressing myc-DSS1, using an anti-myc antibody.

(B) DSS1 RNA levels were measured by qPCR after knockdown with either a non-target control (NT-2) or an anti *DSS-1* shRNA (sh8) which leads to about 5 fold reduction in RNA levels.

(C) hnRNP A2/B1 RNA levels were measured by qPCR after knockdown of a non-target control (NT-2) or a hnRNP A2/B1 –specific shRNA (sh9). Knockdown leads to a 50% reduction in RNA levels.

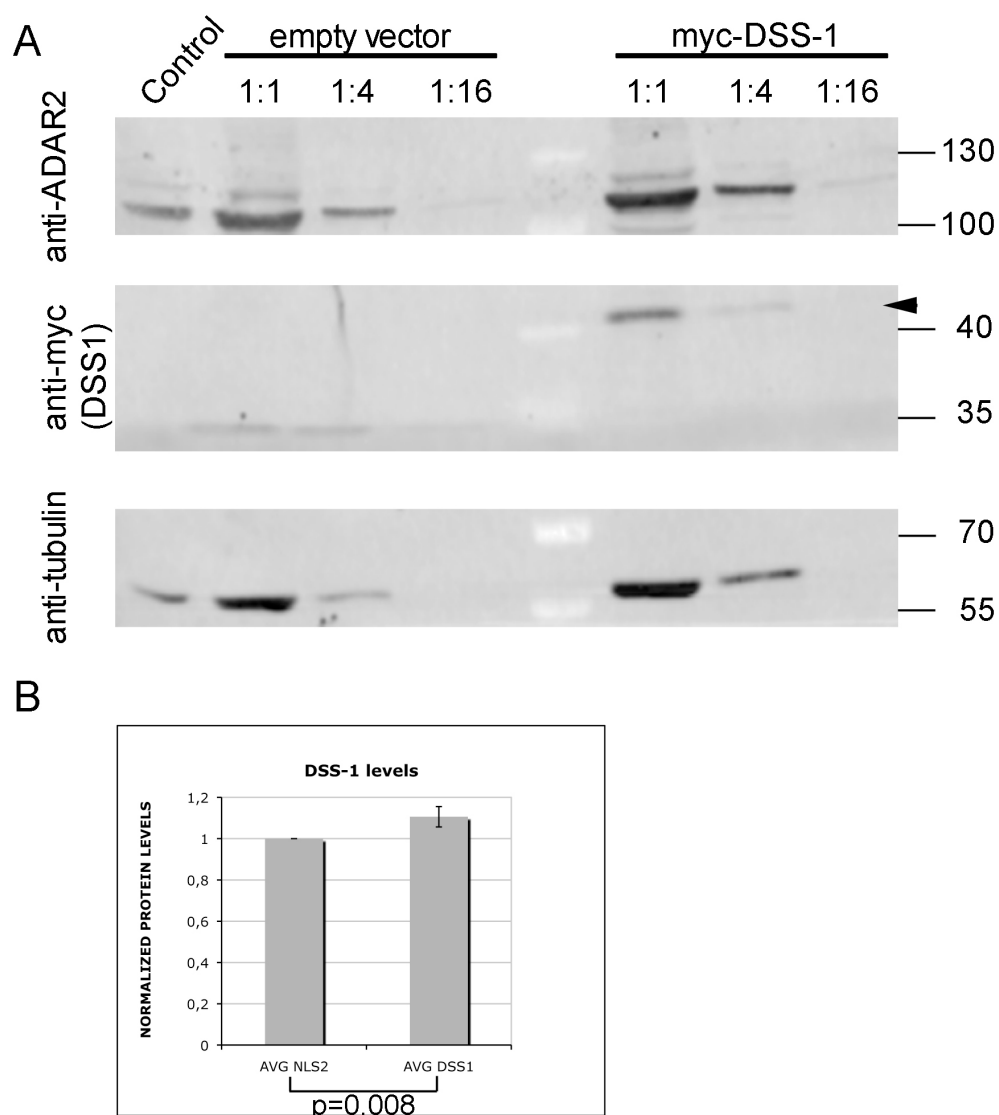

**Figure S3: DSS1 increases cellular ADAR2 levels.** Quantitative western blots for cells transfected with **myc-DSS1** or an empty vector control. **A)** A dilution series of HeLa cells transfected with myc-DSS1 or an empty vector was loaded on an SDS gel, blotted and detected with antibodies as indicated. ADAR2 levels were detected with an anti ADAR2 antibody (top row). DSS1 (**arrowhead**) or the tag of the empty vector were detected with an anti-myc antibody (middle row). For quantification, alpha-tubulin was quantified with a suitable antibody (bottom row). Bands were

directly quantified using fluorimetry of fluorochrome labeled antibodies on an FX-Pro scanner (BioRad).

**B)** Quantification of three independent experiments shows a significant increase of ADAR2 in the presence of DSS1.

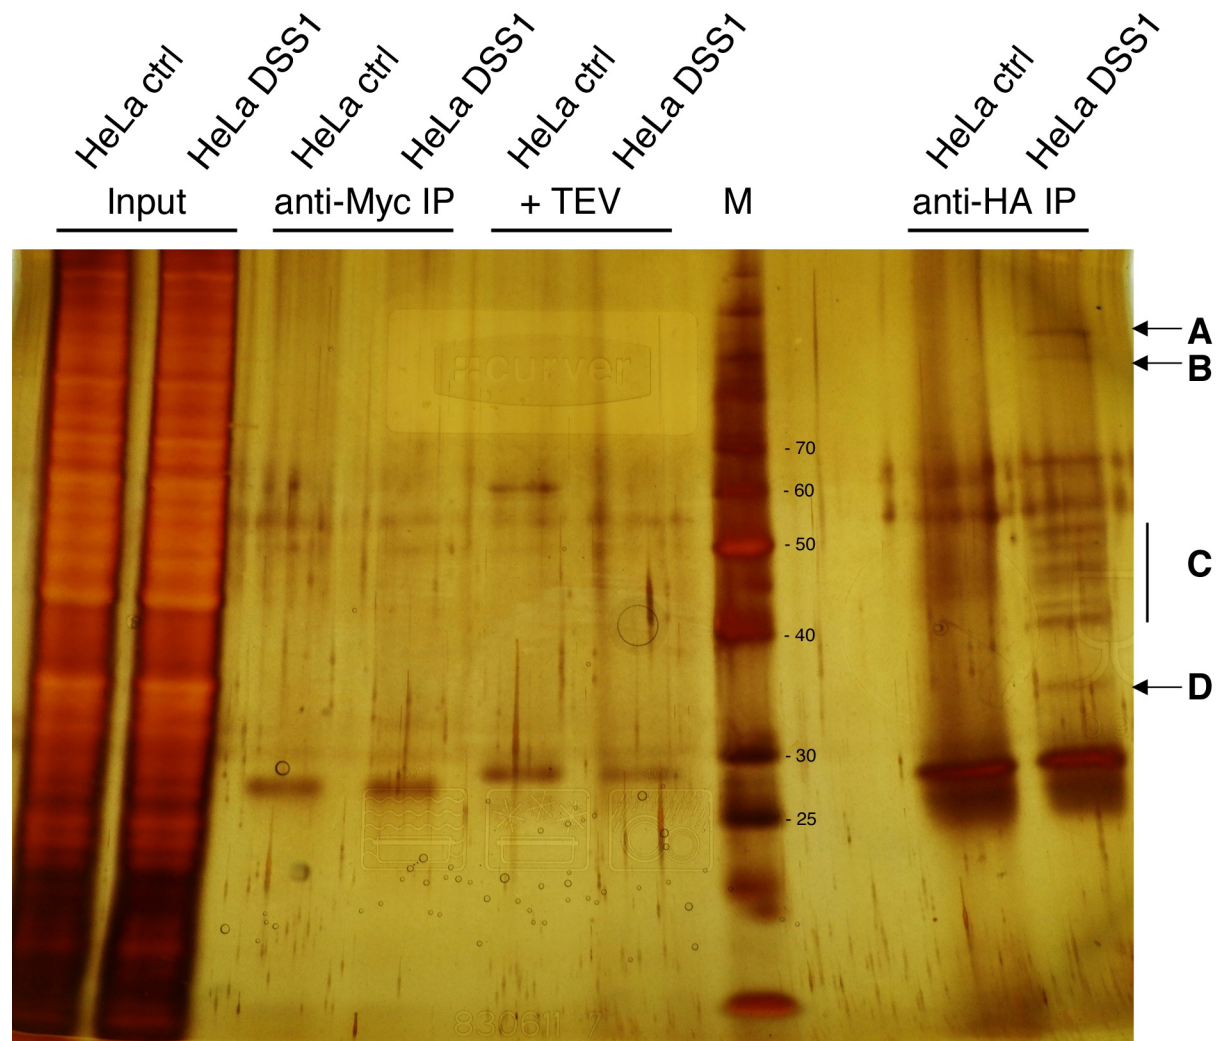

**Figure S4: Representative gel image of a purification of TAP-tagged DSS1.** Aliquots from each purification step as well as the final purified proteins were loaded on a 7-17% SDS gradient gel and silver stained. The marked bands were cut and subjected to mass spectrometric analysis. Protein identities are indicated in Supplementary table 2.



**Supplementary Table 2:** Protein bands purified by TAP tagging and cut out from an SDS PAGE as depicted in supplementary figure 4. The identified proteins, the number of assigned spectra and the % coverage are indicated. hnRNP proteins that were copurified are highlighted in yellow.

|                                                      | assigned spectra | % coverage |
|------------------------------------------------------|------------------|------------|
| <b>Band A, 116 kDa</b>                               |                  |            |
| 26S proteasome non-ATPase regulatory SU1             | 39               | 30.00%     |
| <b>Band B, 106 kDa</b>                               |                  |            |
| 26S proteasome subunit p97                           | 38               | 24.00%     |
| <b>Bands C 59, 56, 52, 5, 49, 47, 45 kDa</b>         |                  |            |
| 26S protease regulatory SU 8                         | 16               | 30.00%     |
| 26S proteasome SU 9                                  | 14               | 25.00%     |
| Proteasome 26S SU, ATPase, 1]                        | 5                | 13.00%     |
| 26S protease regulatory SU 6B                        | 8                | 15.00%     |
| proteasome SU p42                                    | 3                | 8,0%       |
| heterogeneous nuclear ribonucleoprotein G            | 18               | 39%        |
| heterogeneous nuclear ribonucleoprotein D            | 2                | 8.50%      |
| heterogeneous nuclear ribonucleoprotein C            | 2                | 7.30%      |
| <b>Band D 32 kDa</b>                                 |                  |            |
| 26S proteasomeregulatory SU 14                       | 9                | 15.00%     |
| 26S proteasome regulatory SU 13                      | 2                | 2,4%       |
| heterogeneous nuclear ribonucleoprotein A2/B1        | 11               | 27.00%     |
| heterogeneous nuclear ribonucleoprotein A1 isoform b | 3                | 8,3%       |
